# Supplementary material
Source: publisher figshare collection journal article supplement (https://sage.figshare.com/ndownloader/files/14375570)
Supplement: Supplementary file 1 [file 14375570]

**Supplementary Table S1** eHEALS of response rates (N=388)

| <b>Item</b>                                                                                 | <b>Response 1</b>        | <b>Response 2</b> | <b>Response 3</b> | <b>Response 4</b> | <b>Response 5</b>     | <b>Mean</b>    |
|---------------------------------------------------------------------------------------------|--------------------------|-------------------|-------------------|-------------------|-----------------------|----------------|
|                                                                                             | <b>Strongly disagree</b> | <b>Disagree</b>   | <b>Undecided</b>  | <b>Agree</b>      | <b>Strongly agree</b> | <b>(SD)</b>    |
| eHEALS1: I know how to find helpful health resources on the Internet (n=378).               | 10                       | 27                | 110               | 102               | 129                   | 3.83<br>(1.06) |
| eHEALS2: I know how to use the Internet to answer health questions (n=382).                 | 10                       | 9                 | 21                | 157               | 185                   | 4.30<br>(0.88) |
| eHEALS3: I know what health resources are available on the Internet (n=379).                | 16                       | 32                | 41                | 115               | 175                   | 4.06<br>(1.13) |
| eHEALS4: I know where to find helpful health resources on the Internet (388).               | 24                       | 36                | 58                | 110               | 160                   | 3.89<br>(1.22) |
| eHEALS5: I know how to use the health information found on the Internet to help me (n=380). | 19                       | 25                | 75                | 147               | 114                   | 3.82<br>(1.08) |
| eHEALS6: I have the skills to evaluate the health resources found on the Internet (n=371).  | 29                       | 68                | 109               | 127               | 38                    | 3.21<br>(1.10) |
| eHEALS7: I can tell high quality from low quality                                           | 22                       | 38                | 142               | 89                | 93                    | 3.50           |

|                                                |    |    |    |     |    |  |        |
|------------------------------------------------|----|----|----|-----|----|--|--------|
| health resources on the Internet (n=384).      |    |    |    |     |    |  | (0.89) |
| eHEALS8: I feel confident in using information | 20 | 41 | 80 | 149 | 90 |  | 3.65   |
| from the Internet to make decisions (n=380).   |    |    |    |     |    |  | (1.11) |

**Supplementary Table S2** Concurrent validity of the eHealth Literacy Scale using a multiple regression model

| Criterion                         | B (SE)       | $\beta$ (p-value) | 95% CI |       |
|-----------------------------------|--------------|-------------------|--------|-------|
|                                   |              |                   | Lower  | Upper |
| Depression <sup>a</sup>           | -0.08 (0.03) | -0.12 (0.007)     | -0.15  | -0.02 |
| Anxiety <sup>a</sup>              | -0.09 (0.03) | -0.14 (0.009)     | -0.16  | -0.02 |
| PCS <sup>b</sup>                  | 0.03 (0.01)  | 0.14 (0.002)      | 0.005  | 0.06  |
| MCS <sup>b</sup>                  | 0.04 (0.01)  | 0.19 (<0.001)     | 0.02   | 0.06  |
| Adherence to regimen <sup>c</sup> | 0.22 (0.08)  | 0.13 (0.005)      | 0.05   | 0.38  |
| Consulting behavior <sup>c</sup>  | 0.12 (0.06)  | 0.10 (0.045)      | 0.001  | 0.24  |
| Medication adherence <sup>d</sup> | 0.07 (0.01)  | 0.30 (<0.001)     | 0.05   | 0.09  |

The results were adjusted for age, gender, **years of education** and New York Heart

Association (NYHA) classification.

PCS= physical-health composite score; MCS= mental-health composite score

<sup>a</sup> Measured using Hospital Anxiety and Depression Scale

<sup>b</sup> Measured using Short-Form 12

<sup>c</sup> Measured using 9-item European Heart Failure Self-care Behavior Scale (EHFScB-9)

<sup>d</sup> Measured using 5-Item Medication Adherence Report Scale (MARS-5)

**Supplementary Table S3** Measurement invariance across gender and across NYHA classification groups through confirmatory factor analysis.

| Model and comparisons                            | Fit statistics |                               |       |              |       |               |       |                |
|--------------------------------------------------|----------------|-------------------------------|-------|--------------|-------|---------------|-------|----------------|
|                                                  | $\chi^2$ (df)  | $\Delta\chi^2$ ( $\Delta$ df) | CFI   | $\Delta$ CFI | SRMR  | $\Delta$ SRMR | RMSEA | $\Delta$ RMSEA |
| <b>Gender</b>                                    |                |                               |       |              |       |               |       |                |
| M1: Configural                                   | 78.197 (40)*   |                               | 0.972 |              | 0.041 |               | 0.055 |                |
| M2: Plus all loadings constrained                | 80.736 (48)*   |                               | 0.975 |              | 0.039 |               | 0.047 |                |
| M3: Plus all intercepts constrained              | 85.031 (56)*   |                               | 0.977 |              | 0.038 |               | 0.045 |                |
| M2–M1                                            |                | 2.539 (8)                     |       | 0.003        |       | -0.002        |       | -0.008         |
| M3–M2                                            |                | 4.295 (8)                     |       | 0.002        |       | -0.001        |       | -0.002         |
| <b>NYHA classification<sup>a</sup></b>           |                |                               |       |              |       |               |       |                |
| M1: Configural                                   | 49.182 (40)    |                               | 0.983 |              | 0.039 |               | 0.035 |                |
| M2: Plus all loadings constrained                | 61.910 (48)*   |                               | 0.975 |              | 0.042 |               | 0.040 |                |
| M3: Plus all intercepts constrained <sup>b</sup> | 66.351 (56)*   |                               | 0.981 |              | 0.040 |               | 0.037 |                |
| M2–M1                                            |                | 12.728 (8)                    |       | -0.008       |       | 0.003         |       | 0.005          |
| M3–M2                                            |                | 4.441 (8)                     |       | 0.006        |       | -0.002        |       | -0.003         |

\*p&lt;0.05

M1 = Model 1, a configural model; M2 = Model 2, a model based on M1 with all factor loadings constrained being equal across groups; M3 = Mode 3, a model based on M2 with all item intercepts constrained being equal across groups.

NYHA= New York Heart Association; CFI = comparative fit index; SRMR = standardized root mean square residual; RMSEA = root mean square error of approximation
